# Supplementary material for: Viscosity sensing by adjusting the interface of a small liquid droplet/silica composite layer on quartz crystal microbalance
Source: Royal Society of Chemistry journal article supplement (doi:10.1039/c6ra02597h), 2016-01-01
Supplement: c6ra02597h1.pdf [file c6ra02597h1.pdf]

## Supporting information

### Material & Fabrication method

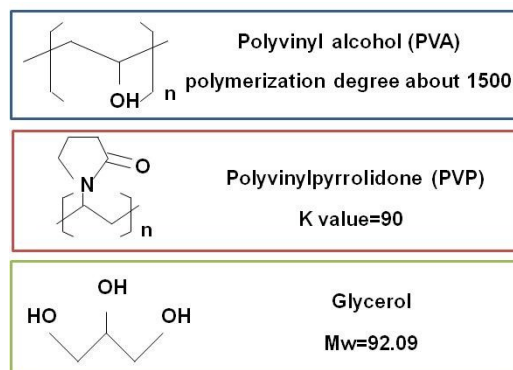

Fig S1. Viscous Materials

Viscosity of PVA and PVP at 20 °C was measured by conventional rotational viscometer. Viscosity data at 20 °C of glycerol was cited from Miyoshi oil & fat co., Ltd.

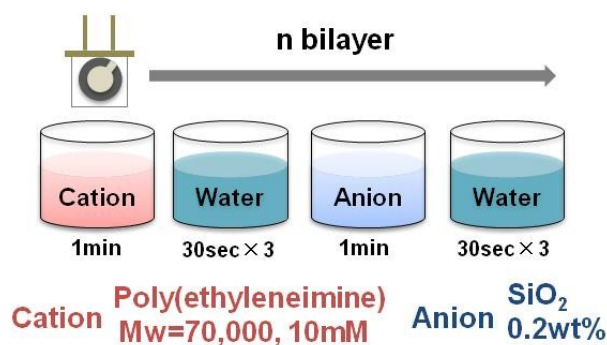

Fig S2. Layer by Layer (LbL) self assembly method of PEI and SiO<sub>2</sub>

A thin hydrophilic film was fabricated using a wet process by alternately depositing the QCM substrate in cationic solution for 60sec, pure water for 30sec × 3times, anionic solutions for 60sec and pure water for 30sec × 3times.

## Hydrophilic coating

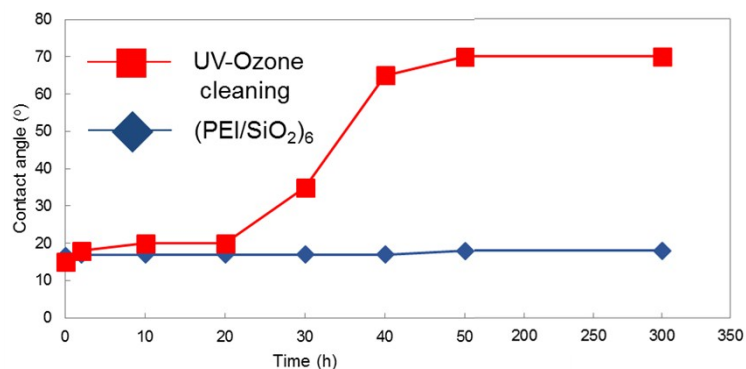

Fig S3. Hydrophilic treatments

Compared with UV-ozone treatment, (PEI/SiO<sub>2</sub>)<sub>6</sub> hydrophilic coating fabricated by LbL method had long-term hydrophilicity.

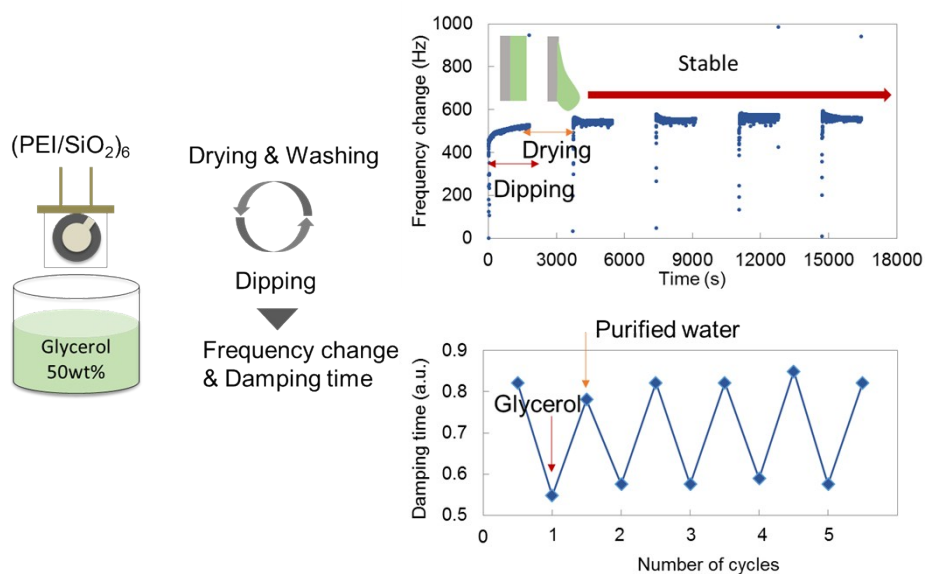

Fig S4. Repeatability of frequency change and damping time with using (PEI/SiO<sub>2</sub>)<sub>6</sub> hydrophilic coated QCM

We measured the repeatability of frequency change and damping time of (PEI/SiO<sub>2</sub>)<sub>6</sub> coated QCM in glycerol solutions. Although it was difficult to remove viscous solution in drying process due to hydrophilicity and it had abnormal frequency, the frequency was stable in dipping condition. In addition, we were able to observe repeatable damping time measurement in glycerol solution and purified water with using (PEI/SiO<sub>2</sub>)<sub>6</sub> hydrophilic coated QCM.

# QCM-D

Table S1. Damping time measurement (a.u.) of glycerol, PVA and PVP with using the bare or hydrophilic QCM

(a)

| Bare QCM / Glycerol(aq) 30μl |               |          |
|------------------------------|---------------|----------|
| Concentration(wt%)           | Damping time  |          |
|                              | Measured (ms) | Relative |
| -                            | 73.0          | 1.000    |
| 0                            | 62.0          | 0.849    |
| 20                           | 60.3          | 0.826    |
| 30                           | 55.0          | 0.753    |
| 40                           | 51.6          | 0.707    |
| 50                           | 40.0          | 0.547    |
| 60                           | 23.3          | 0.319    |

(b)

| Hydrophilic QCM / Glycerol(aq) 5μl |                     |          |
|------------------------------------|---------------------|----------|
| Concentration(wt%)                 | Damping time        |          |
|                                    | Measured value (ms) | Relative |
| -                                  | 73.0                | 1.000    |
| 0                                  | 62.3                | 0.853    |
| 20                                 | 58.3                | 0.799    |
| 30                                 | 54.6                | 0.748    |
| 40                                 | 51.0                | 0.698    |
| 50                                 | 38.3                | 0.525    |
| 60                                 | 20.0                | 0.274    |

(c)

| Bare QCM / PVA(aq) 30μl |                     |          |
|-------------------------|---------------------|----------|
| Concentration(wt%)      | Damping time        |          |
|                         | Measured value (ms) | Relative |
| -                       | 73.0                | 1.000    |
| 0                       | 65.0                | 0.890    |
| 5                       | 60.0                | 0.822    |
| 7.5                     | 56.7                | 0.776    |
| 10                      | 50.7                | 0.694    |
| 12.5                    | 41.7                | 0.571    |
| 15                      | 27.0                | 0.370    |

(d)

| Hydrophilic QCM / PVA(aq) 5μl |                     |          |
|-------------------------------|---------------------|----------|
| Concentration(wt%)            | Damping time        |          |
|                               | Measured value (ms) | Relative |
| -                             | 73.0                | 1.000    |
| 0                             | 62.3                | 0.853    |
| 5                             | 62.0                | 0.849    |
| 7.5                           | 55.0                | 0.753    |
| 10                            | 50.3                | 0.689    |
| 12.5                          | 41.3                | 0.566    |
| 15                            | 24.0                | 0.329    |

(e)

| Bare QCM / PVP(aq) 30μl |                     |          |
|-------------------------|---------------------|----------|
| Concentration(wt%)      | Damping time        |          |
|                         | Measured value (ms) | Relative |
| -                       | 73.0                | 1.000    |
| 0                       | 65.0                | 0.890    |
| 5                       | 58.7                | 0.804    |
| 10                      | 54.0                | 0.740    |
| 15                      | 50.7                | 0.694    |
| 20                      | 43.7                | 0.598    |
| 25                      | 22.7                | 0.311    |

(f)

| Hydrophilic QCM / PVP(aq) 5μl |                     |          |
|-------------------------------|---------------------|----------|
| Concentration(wt%)            | Damping time        |          |
|                               | Measured value (ms) | Relative |
| -                             | 73.0                | 1.000    |
| 0                             | 62.3                | 0.854    |
| 5                             | 63.0                | 0.863    |
| 10                            | 57.0                | 0.781    |
| 15                            | 50.0                | 0.685    |
| 20                            | 37.5                | 0.514    |
| 25                            | 25.0                | 0.342    |

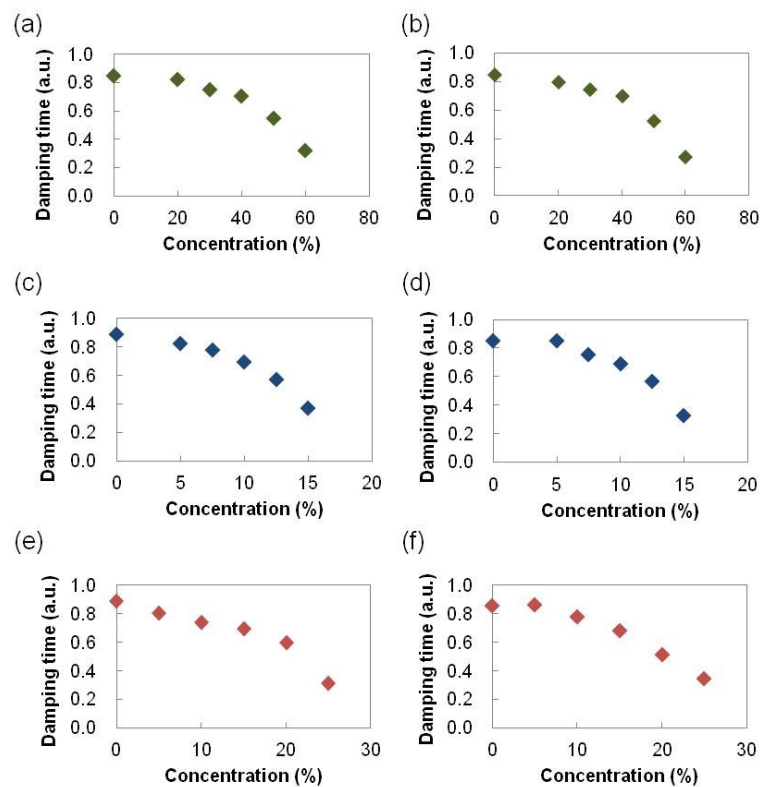

Fig S5. The relationship between damping time and concentration

(a) glycerol with bare QCM-D, (b) glycerol with hydrophilic QCM-D, (c) PVA with bare QCM-D, (d) PVA with hydrophilic QCM-D, (e) PVP with bare QCM-D and (f) PVP with hydrophilic QCM-D.
